# Supplementary material for: The present and potential future of aqueous mercury preservation: a review
Source: Royal Society of Chemistry journal article supplement (doi:10.1039/d2em00409g), 2023-01-01
Supplement: d2em00409g1.pdf [file d2em00409g1.pdf]

## Supplementary information

Supplementary Table 1 Reagent-based preservation methods for Hg, reported storage times, analytical merit and challenges

| Reagent                                               | Mercury species                     | Storage time                 | Sample volume reported                                                     | Analytical merit and challenges                                                                                                                                                                                                                                                                                                                                                                                                                      | References |
|-------------------------------------------------------|-------------------------------------|------------------------------|----------------------------------------------------------------------------|------------------------------------------------------------------------------------------------------------------------------------------------------------------------------------------------------------------------------------------------------------------------------------------------------------------------------------------------------------------------------------------------------------------------------------------------------|------------|
| <b>Acidification</b>                                  |                                     |                              |                                                                            | <ul style="list-style-type: none"> <li>Recommended for many metals and trace elements</li> <li>In an uncontrolled environment, there is a risk of acid burns and skin irritation from spills</li> <li>A pH &lt;4 promotes stable chloro-mercury complexes in the presence of chloride ions</li> </ul>                                                                                                                                                |            |
| Hydrochloric acid (0.4-1 %)                           | Hg <sup>2+</sup> in freshwater      | 6-12 months (>90 % recovery) | 0.5-1 L in polytetrafluoroethylene (PTFE) or glass containers              | <ul style="list-style-type: none"> <li>&gt;90 % recovery over long term storage (12 months)</li> <li>Recommended container materials are either hazardous (glass, risk of cuts from breakage) or expensive (PTFE, £15-30 per bottle)</li> </ul>                                                                                                                                                                                                      | 8-10,28    |
| Nitric (1 %) and hydrochloric acid (0.005 %)          | Hg <sup>2+</sup> in deionised water | 53 days (>90 % recovery)     | 500 mL in high-density polyethylene (HDPE) containers                      | <ul style="list-style-type: none"> <li>Recoveries of &gt;90 % Hg<sup>2+</sup> can be obtained with small quantities of acid</li> <li>A nitric and hydrochloric acid mixture is a common matrix for ICP-MS analysis, which is sensitive enough for Hg analysis</li> </ul>                                                                                                                                                                             | 8,9,28     |
| Sulphuric acid (0.2 %)                                | MeHg in seawater                    | 6 months                     | Not specified as a series of different experiments – PE container material | <ul style="list-style-type: none"> <li>Mitigates formation of artificial MeHg during speciation by distillation and ethylation</li> <li>This speciation method is less prevalent nowadays, due to the development of HPLC speciation</li> </ul>                                                                                                                                                                                                      | 10         |
| <b>Oxidising agent</b>                                |                                     |                              |                                                                            | <ul style="list-style-type: none"> <li>Oxidises species to inorganic Hg<sup>2+</sup> (comparatively more stable than Hg<sup>0</sup>)</li> <li>Risk of oxidising atmospheric Hg<sup>0</sup> and artificially increasing Hg concentration (particularly for trace Hg concentrations of relatively high atmospheric Hg<sup>0</sup> concentrations)</li> <li>Oxidising chemicals are often harmful, risk of spillage and harm to the operator</li> </ul> |            |
| Potassium permanganate-persulphate digestive solution | Hg <sup>2+</sup> in deionised water | 560 days (negligible losses) | 50 mL in polypropylene (PP) containers                                     | <ul style="list-style-type: none"> <li>Negligible losses by adsorption for 0.2 – 1 µg L<sup>-1</sup> Hg<sup>2+</sup></li> <li>Improves cost-effectiveness by allowing use of polypropylene containers</li> <li>Increased risk of spills and harm to the operator in an uncontrolled environment</li> </ul>                                                                                                                                           | 15         |

|                                                                                          |                                     |                                                        |                                                |                                                                                                                                                                                                                                                                                                                                                                                                                                                                                   |       |
|------------------------------------------------------------------------------------------|-------------------------------------|--------------------------------------------------------|------------------------------------------------|-----------------------------------------------------------------------------------------------------------------------------------------------------------------------------------------------------------------------------------------------------------------------------------------------------------------------------------------------------------------------------------------------------------------------------------------------------------------------------------|-------|
| Potassium dichromate solution (0.05 % w.v, acidified)<br><b>Increased ionic strength</b> | Hg <sup>2+</sup> in deionised water | 21 days (>95 % recovery)                               | 100 mL in borosilicate glass and PE containers | <ul style="list-style-type: none"> <li>Effectively preserves Hg for up to 21 days, further investigation has not been conducted</li> <li>As a strong oxidising agent, there is a risk to the operator, especially in an uncontrolled environment</li> <li>Mitigates wall sorption by reducing the number of active sites in container walls</li> <li>Formation of Hg(OH)<sub>x</sub><sup>2-x</sup> can be limited with the introduction of different complexing agents</li> </ul> | 17,73 |
| Sodium nitrate (3 %)                                                                     | Hg <sup>2+</sup> in deionised water | 90 days (95 % recovery in PP, >95 % recovery in glass) | 50 mL in PP or glass containers                | <ul style="list-style-type: none"> <li>An initial loss of 5 % Hg is seen over 7 days (likely stabilisation and losses to with container walls)</li> <li>Below 3 % sodium nitrate, the recovery of Hg drops to &lt;90 % in PP containers</li> </ul>                                                                                                                                                                                                                                | 15    |
| Sodium chloride (1-3 g L <sup>-1</sup> )                                                 | Hg <sup>2+</sup> in deionised water | 180 days (>95 % recovery)                              | 50 mL in PP containers                         | <ul style="list-style-type: none"> <li>Chloro-mercury complexes are promoted, improving stability of the metal</li> <li>The initial loss of Hg is decreased to &lt;2 % over 7 days</li> </ul>                                                                                                                                                                                                                                                                                     | 15,28 |
| Sodium chloride (20 mg L <sup>-1</sup> , acidified)                                      | Hg <sup>2+</sup> in deionised water | 35 days (>98 % recovery)                               | 500 mL in PP containers                        | <ul style="list-style-type: none"> <li>Low pH and increased chloride concentrations further promotes chloro-mercury complexes</li> <li>Stability was only recorded up to 35 days, but further preservation is likely possible</li> </ul>                                                                                                                                                                                                                                          | 28    |

*Supplementary Table 2 Solid-phase extraction sorbents for Hg, reported recoveries, detection limits, analytical merits and difficulties*

| Sorbent/Solid-phase functionalization | Hg species | Matrix | Eluent/digestion | Detection limit | Recovery | Mesh/pore/particle size | Analytical merits and difficulties | References |
|---------------------------------------|------------|--------|------------------|-----------------|----------|-------------------------|------------------------------------|------------|
| Thiol functionalised resins           |            |        |                  |                 |          |                         |                                    |            |

|                                                                                                                             |                                     |                                                                                     |                                                                                                                                                                |                                                                                                                                                                            |                                                       |                                                                                                                                                                                       |                                                                                                 |                                                                                                                                                                                                                                                                                                                                                                                                                                                                |       |
|-----------------------------------------------------------------------------------------------------------------------------|-------------------------------------|-------------------------------------------------------------------------------------|----------------------------------------------------------------------------------------------------------------------------------------------------------------|----------------------------------------------------------------------------------------------------------------------------------------------------------------------------|-------------------------------------------------------|---------------------------------------------------------------------------------------------------------------------------------------------------------------------------------------|-------------------------------------------------------------------------------------------------|----------------------------------------------------------------------------------------------------------------------------------------------------------------------------------------------------------------------------------------------------------------------------------------------------------------------------------------------------------------------------------------------------------------------------------------------------------------|-------|
| Dithizone functionalised silica (for preconcentration)                                                                      | Hg <sup>2+</sup> , MeHg, EtHg       | DI water, tap water ( <b>filtered</b> waters)                                       | 100 mmol L <sup>-1</sup> sodium thiosulphate or 1% 2-mercaptoethanol                                                                                           | 3 ng L <sup>-1</sup> by HPLC-ICP-MS                                                                                                                                        | 83.4 % Hg <sup>2+</sup><br>93.7 % MeHg<br>71.7 % EtHg | Storage capacity: not investigated, dependent on load of functional reagent, 20 µg L <sup>-1</sup> Hg tested with a 12.5 µg dithizone load<br>Pore size: 60 Å<br>Particle size: 45 µm | <ul style="list-style-type: none"> <li>+</li> <li>+</li> <li>–</li> <li>–</li> <li>–</li> </ul> | Selective for Hg and its species<br>Extraction efficiency and elution were not affected after 7 days storage at 4 °C<br>Must be functionalised before use, so time between functionalisation and sampling needs to be accounted for<br>Optimised for pH 4 samples, higher and lower pH values may affect performance<br>High chloride concentration lowers Hg adsorption                                                                                       | 42,53 |
| 2-mercaptophenol-Hg complex on C18 microcolumn (for preconcentration)                                                       | Hg <sup>2+</sup> , MeHg, EtHg, PhHg | Sediments, zoobenthos, river water ( <b>filtered</b> and acidified to pH3 with HCl) | Solid samples were microwave digested with HCl (3 mol L <sup>-1</sup> ), citric acid (0.2 mol L <sup>-1</sup> ), methanol (50%) (10 mL). Elution with methanol | Hg <sup>2+</sup> =0.9 µg L <sup>-1</sup> , MeHg=4.3 µg L <sup>-1</sup> , EtHg=1.4 µg L <sup>-1</sup> , PhHg=0.8 µg L <sup>-1</sup> by AMA mercury analyser and HPLC/CV-AFS | >90 %                                                 | Storage capacity: up to 155 µg Hg (500 mL sample) with 20 mL 14 mmol L <sup>-1</sup> complexing agent<br>Pore size: 80 Å<br>Particle size: 5 µm                                       | <ul style="list-style-type: none"> <li>+</li> <li>+</li> <li>–</li> <li>–</li> </ul>            | No functionalisation of resin is required, instead a complexing agent (2-mercaptophenol) is added to the sample<br>~95 % extraction efficiency was reported with preconcentration factors of up to 1000 using 500 mL sample<br>2-mercaptoethanol has a strong, unpleasant odour and is harmful in high concentrations and must be diluted before use<br>Any iron may compete with Hg for complexation with the 2-mercaptoethanol and interfere with extraction | 54    |
| Diethyldithiocarbamate functionalised C18 microcolumn (for preservation and storage)                                        | Hg <sup>2+</sup> , MeHg             | River water ( <b>filtered</b> waters)                                               | 5% (v/v) thiosulphate + 0.5% (v/v) HCl                                                                                                                         | Hg <sup>2+</sup> =5.2 ng L <sup>-1</sup> , MeHg=5.6 ng L <sup>-1</sup> by LC-ICP-MS                                                                                        | 97 %                                                  | Storage capacity not investigated, but 30 ng Hg successfully recovered<br>Unspecified pore and particle sizes.                                                                        | <ul style="list-style-type: none"> <li>+</li> <li>+</li> <li>–</li> <li>–</li> </ul>            | The sorbent operates under a wide range of pH values, so suitable for a variety of matrices<br>Spiked river waters showed >80 % Hg <sup>2+</sup> recovery reported for up to 30 days storage at 4°C in the dark (80 % MeHg recovery up to 7 days storage)<br>Must be functionalised before use, so time between functionalisation and sampling must be accounted for<br>MeHg recovery significantly decreases after 7 days to 50 % recovery at 14 days         | 33    |
| <b>Commercially available resins</b><br>Duolite GT-73™ as a diffusive gradient thin film (for preconcentration and removal) | Hg <sup>2+</sup>                    | DI water, tap water, river water ( <b>filtered</b> in the DGT apparatus)            | Thermal decomposition (total Hg)                                                                                                                               | 0.05 µg L <sup>-1</sup> by LC-AFS                                                                                                                                          | 95 %                                                  | Storage capacity: 2.4 mg per DGT disk<br>Particle size: sieved to <150 µm                                                                                                             | <ul style="list-style-type: none"> <li>+</li> <li>+</li> <li>–</li> <li>–</li> </ul>            | The resin has a high sorption capacity and is selective for Hg<br>Can be synthesised as a diffusive thin film, so can be immersed directly into the water source<br>The resin is no longer commercially available, but alternatives are available<br>Desorption of Hg is difficult, so the resin must be digested using a nitric and hydrochloric acid mixture, eliminating the possibility of re-use                                                          | 56    |

|                                                                                      |                                         |                                                                             |                                                                                       |                                                                                                                                                                                                     |       |                                                                                                                                 |                                                                                                 |                                                                                                                                                                                                                                                                                                                                                                                                                                                                                                                                                                                                                                     |        |
|--------------------------------------------------------------------------------------|-----------------------------------------|-----------------------------------------------------------------------------|---------------------------------------------------------------------------------------|-----------------------------------------------------------------------------------------------------------------------------------------------------------------------------------------------------|-------|---------------------------------------------------------------------------------------------------------------------------------|-------------------------------------------------------------------------------------------------|-------------------------------------------------------------------------------------------------------------------------------------------------------------------------------------------------------------------------------------------------------------------------------------------------------------------------------------------------------------------------------------------------------------------------------------------------------------------------------------------------------------------------------------------------------------------------------------------------------------------------------------|--------|
| AmberSep GT-74™ as a diffusive gradient thin film (for preconcentration and removal) | Hg <sup>2+</sup> , MeHg<br>EtHg<br>PhHg | DI water, tap water, river water<br>( <b>filtered</b> in the DGT apparatus) | Thermal decomposition (total Hg), microwave extraction with 6 mol L <sup>-1</sup> HCl | Hg <sup>2+</sup> =13 ng L <sup>-1</sup> ,<br>MeHg=38 ng L <sup>-1</sup> , EtHg=34 ng L <sup>-1</sup> , PhHg=30 ng L <sup>-1</sup> by Advanced Mercury Analyser (AMA245) for absorption spectroscopy | >95 % | Storage capacity: 3.8 mg per DGT disk<br>Particle size: sieved to <150 µm                                                       | <ul style="list-style-type: none"> <li>+</li> <li>+</li> <li>–</li> <li>–</li> </ul>            | <p>The resin has a high sorption capacity and is selective for Hg</p> <p>Can be synthesised as a diffusive thin film, so can be immersed directly into the water source</p> <p>The resin is no longer commercially available, but alternatives are available</p> <p>The resin is reluctant to release Hg, so other analysis methods are required such as thermal desorption and atomic absorption</p>                                                                                                                                                                                                                               | 56, 58 |
| <b>Cationic exchange resins</b>                                                      |                                         |                                                                             |                                                                                       |                                                                                                                                                                                                     |       |                                                                                                                                 |                                                                                                 |                                                                                                                                                                                                                                                                                                                                                                                                                                                                                                                                                                                                                                     |        |
| Dowex 50W X4™ as a microcolumn (for preconcentration and removal)                    | Hg <sup>2+</sup>                        | Mineral, spring and tap-water                                               | 0.1% thiourea + 8% HCl                                                                | 27 ng L <sup>-1</sup> by CV-AAS                                                                                                                                                                     | >79 % | Storage capacity: Not investigated, but 860 µg Hg was totally adsorbed by 0.5 g sorbent<br>Particle size: 150-300 µm            | <ul style="list-style-type: none"> <li>+</li> <li>+</li> <li>–</li> <li>–</li> </ul>            | <p>Recoveries of &gt;79 % were reported for natural water samples spiked to 10 µg L<sup>-1</sup> Hg<sup>2+</sup></p> <p>As a non-specific sorbent, multi-elemental analysis is possible</p> <p>Copper and iron significantly decrease the recovery of Hg by direct determination and selenium (IV) cause signal suppression in CV-AAS analysis</p> <p>A sequential elution is required to remove interfering ions</p>                                                                                                                                                                                                               | 59     |
| <b>Polyaniline</b>                                                                   |                                         |                                                                             |                                                                                       |                                                                                                                                                                                                     |       |                                                                                                                                 |                                                                                                 |                                                                                                                                                                                                                                                                                                                                                                                                                                                                                                                                                                                                                                     |        |
| Polyaniline (PANi) as a microcolumn (for preconcentration and removal)               | Hg <sup>2+</sup> , MeHg                 | Lake water, groundwater, seawater, fish tissue                              | 0.3% HCl (for MeHg) and 0.3% HCl + 0.02% thiourea (for Hg <sup>2+</sup> )             | 0.05 ng L <sup>-1</sup> by CV-AAS                                                                                                                                                                   | >96 % | Storage capacity: 100 mg Hg <sup>2+</sup> g <sup>-1</sup> resin, 2.5 mg MeHg g <sup>-1</sup> resin<br>Particle size: 100-150 µm | <ul style="list-style-type: none"> <li>+</li> <li>+</li> <li>–</li> <li>–</li> <li>–</li> </ul> | <p>The resin has a high sorption capacity (100 mg g<sup>-1</sup> Hg<sup>2+</sup> and 2.5 mg g<sup>-1</sup> MeHg)</p> <p>A 100 mL sample can be used to achieve preconcentration factors of 120 for Hg<sup>2+</sup> and 60 for MeHg from lake water, ground water and seawater</p> <p>Lower pH values (&lt;2) significantly affect the Hg removal ratio to &lt;20 %, higher pH values (&gt;6) also decrease the Hg removal ratio (&lt;80 %)</p> <p>A pH of 4-5 is preferred to ensure nitrogen atoms are not fully protonated and can bind to Hg from solution</p> <p>The sorbent must be synthesised and homogenised before use</p> | 36     |

|                                                                                             |                  |          |                                          |                                                                                    |                                            |                                                                                                 |                                                                                                            |                                                                                                                                                                                                                                                                                                                                                                                                                                                                                                                                                                                                                                                                                                                                                             |    |
|---------------------------------------------------------------------------------------------|------------------|----------|------------------------------------------|------------------------------------------------------------------------------------|--------------------------------------------|-------------------------------------------------------------------------------------------------|------------------------------------------------------------------------------------------------------------|-------------------------------------------------------------------------------------------------------------------------------------------------------------------------------------------------------------------------------------------------------------------------------------------------------------------------------------------------------------------------------------------------------------------------------------------------------------------------------------------------------------------------------------------------------------------------------------------------------------------------------------------------------------------------------------------------------------------------------------------------------------|----|
| Polyaniline-polyvinyl alcohol (PANi-PVA) as batch sorbent applied to solution (for removal) | Hg <sup>2+</sup> | DI water | 0.1 mol L <sup>-1</sup> HNO <sub>3</sub> | FAAS. No detection limit was reported                                              | 90 % Hg removal after 30 mins contact time | Storage capacity: 7.5 mg Hg g <sup>-1</sup> resin<br>No specification for particle or pore size | <ul style="list-style-type: none"> <li>+</li> <li>+</li> <li>–</li> <li>–</li> </ul>                       | <p>The sorbent has a high sorption capacity (&gt;90 % removal from a 35 mg L<sup>-1</sup> Hg<sup>2+</sup> solution at pH 6)</p> <p>Desorption of Hg was reported with 0.1 M HNO<sub>3</sub>, although this required 90 minutes to achieve 90 % recovery</p> <p>Chloride at 30 mmol L<sup>-1</sup> significantly decreases adsorption of Hg to &lt;15 %, likely due to chloro-mercury complexation</p> <p>The sorbent must be synthesised and homogenised before use</p>                                                                                                                                                                                                                                                                                     | 63 |
| Polyaniline-humic acid (PANi-HA) as batch sorbent applied to solution (for removal)         | Hg <sup>2+</sup> | DI water | No desorption investigated               | AFS of supernatant. No detection limit was reported                                | 95 %                                       | Storage capacity: 671 mg Hg g <sup>-1</sup> resin<br>Particle size: 50-60 nm                    | <ul style="list-style-type: none"> <li>+</li> <li>+</li> <li>+</li> <li>–</li> <li>–</li> <li>–</li> </ul> | <p>The addition of humic acid widens the operable pH range to between 4 – 7, with Hg removal at &gt;90 %.</p> <p>The additional humic acid stabilises PANi by mitigating aggregation of the sorbent</p> <p>The sorption capacity is high (671 mg g<sup>-1</sup> Hg<sup>2+</sup>) and most other ions in samples do not significantly affect Hg removal</p> <p>Chloride concentrations of 50 mg L<sup>-1</sup> significantly decrease removal of Hg from samples to &lt;20 %</p> <p>Desorption from the composite has not been explored, nor stability of retained Hg species over time</p> <p>Humic acid is a broad term to define many naturally occurring organic molecules, so extraction efficiency may vary between batches of synthesised sorbent</p> | 48 |
| Polyaniline-polystyrene (PANi-PE) as batch sorbent applied to solution (for removal)        | Hg <sup>2+</sup> | DI water | DI water, no desorption noted            | β-activity by an end window Geiger-Müller counter. No detection limit was reported | 67 %                                       | Storage capacity: 0.15 mg Hg g <sup>-1</sup> resin<br>No particle size specified                | <ul style="list-style-type: none"> <li>+</li> <li>+</li> <li>–</li> <li>–</li> </ul>                       | <p>The stability of the sorbent is improved, as polyethylene prevents aggregation of PANi</p> <p>The composite was reported to adsorb 79 % Hg from a 10 ng L<sup>-1</sup> Hg<sup>2+</sup> solution</p> <p>Mercury is not readily desorbed from the composite. 47 % was desorbed with 0.1 M HNO<sub>3</sub> after 30 minutes</p> <p>Interfering ions and characteristics have not been explored</p>                                                                                                                                                                                                                                                                                                                                                          | 64 |

## Magnetic SPE

|                                                                                      |                         |                                                                        |                                                              |                                            |       |                                                                                                                                 |                                                                                                                                                                                                                                                                                                                                                                                                                                                                                                                                                                                                                                                                                                                                                                                                                                                                                                                                                                                                                                                                                                                                                                                                                                   |    |
|--------------------------------------------------------------------------------------|-------------------------|------------------------------------------------------------------------|--------------------------------------------------------------|--------------------------------------------|-------|---------------------------------------------------------------------------------------------------------------------------------|-----------------------------------------------------------------------------------------------------------------------------------------------------------------------------------------------------------------------------------------------------------------------------------------------------------------------------------------------------------------------------------------------------------------------------------------------------------------------------------------------------------------------------------------------------------------------------------------------------------------------------------------------------------------------------------------------------------------------------------------------------------------------------------------------------------------------------------------------------------------------------------------------------------------------------------------------------------------------------------------------------------------------------------------------------------------------------------------------------------------------------------------------------------------------------------------------------------------------------------|----|
| 1,2-ethanedithiol as batch sorbent applied to solution (for preconcentration)        | Hg <sup>2+</sup>        | DI water, lake water ( <b>filtered</b> waters)                         | 0.1 mol L <sup>-1</sup> HNO <sub>3</sub> + 2% (m/v) thiourea | 0.82 ng L <sup>-1</sup> by ICP-MS          | >90 % | Storage capacity: 254 mg Hg g <sup>-1</sup> resin<br>Particle size: 400 nm                                                      | <ul style="list-style-type: none"> <li>+ &gt;95 % adsorption of Hg over pH 2 – 8 and &gt;95 % recover using a 4 % thiourea, 0.5 M HNO<sub>3</sub> eluent solution</li> <li>+ Common cations and anions do not significantly impact the adsorption or recovery of Hg at 5000 mg L<sup>-1</sup> Ca<sup>2+</sup>, Mg<sup>2+</sup>, Cl<sup>-</sup>, SO<sub>4</sub><sup>2-</sup>, Na<sup>+</sup>, NO<sub>3</sub><sup>-</sup>, 10 mg L<sup>-1</sup> Al<sup>3+</sup>, Zn<sup>2+</sup>, Fe<sup>2+ or 3+</sup>, and 1 mg L<sup>-1</sup> Cu<sup>2+</sup></li> <li>+ The sorbent has a high sorption capacity (254 mg g<sup>-1</sup> Hg) and can extract lead and cadmium, so is potentially suitable for multi-elemental analysis</li> <li>+ Recoveries of &gt;93 % were reported for river water and lake waters spiked with 50 – 1000 ng L<sup>-1</sup> Hg<sup>2+</sup></li> <li>– The multi-step synthesis has a yield of &lt;50 % and may not be readily scaled up</li> <li>– The stability of the sorbent and of Hg retained on the sorbent has not been investigated</li> <li>– Speciation analysis has not been investigated for this sorbent, so the usefulness for toxicity studies and monitoring is not fully defined</li> </ul> | 65 |
| 3-mercaptopropyl-trimethoxysilane as batch sorbent applied to solution (for removal) | Hg <sup>2+</sup> , MeHg | DI water, lake water, tap water, sea water ( <b>unfiltered</b> waters) | 0.5 mol L <sup>-1</sup> HCl + 1% thiourea                    | 0.1, 0.3 ng L <sup>-1</sup> by HPLC-ICP-MS | >90 % | Storage capacity: Not investigated, focused on trace Hg (10 ng L <sup>-1</sup> Hg, 500 mL sample)<br>No particle size specified | <ul style="list-style-type: none"> <li>+ A &gt;90 % recovery of Hg<sup>2+</sup> and MeHg using 500 mL of a 20 ng L<sup>-1</sup> Hg spiked tap, sea and lake waters</li> <li>+ The sorbent can be freely added to the sample and removed with a magnet after 10 minutes stabilisation time</li> <li>+ The sorbent can be reused up to 5 times without significant degradation of performance</li> <li>– The sorbent requires a multi-step synthesis and characterisation, which may not be readily scaled up</li> <li>– Common ions and interferences were not investigated</li> </ul>                                                                                                                                                                                                                                                                                                                                                                                                                                                                                                                                                                                                                                             | 43 |

|                                                                                                             |                                     |                                                                                                                                                                                      |                                                                                  |                                                                  |       |                                                                                                                                  |                                                                                                            |                                                                                                                                                                                                                                                                                                                                                                                                                                                                                                                                                                                                                                                                                                          |    |
|-------------------------------------------------------------------------------------------------------------|-------------------------------------|--------------------------------------------------------------------------------------------------------------------------------------------------------------------------------------|----------------------------------------------------------------------------------|------------------------------------------------------------------|-------|----------------------------------------------------------------------------------------------------------------------------------|------------------------------------------------------------------------------------------------------------|----------------------------------------------------------------------------------------------------------------------------------------------------------------------------------------------------------------------------------------------------------------------------------------------------------------------------------------------------------------------------------------------------------------------------------------------------------------------------------------------------------------------------------------------------------------------------------------------------------------------------------------------------------------------------------------------------------|----|
| 1,5-diphenylcarbazide as batch sorbent applied to solution (for preconcentration)                           | Hg <sup>2+</sup>                    | DI water, river water, tap water, (oxidised with H <sub>2</sub> O <sub>2</sub> , acidified to pH1 with HCl, <b>filtered</b> ) vegetation (microwave digested with HNO <sub>3</sub> ) | Regeneration with 0.5 mol L <sup>-1</sup> HNO <sub>3</sub> (No elution assessed) | 0.16 µg L <sup>-1</sup> by CV-AAS                                | >95 % | Storage capacity: 44 mg Hg g <sup>-1</sup> resin<br>Particle size: 60-80 nm                                                      | <ul style="list-style-type: none"> <li>+</li> <li>+</li> <li>+</li> <li>+</li> <li>–</li> <li>–</li> </ul> | <p>Common ions in water (Ca<sup>2+</sup>, Mg<sup>2+</sup>, Cl<sup>-</sup>) have no significant effect on Hg adsorption up to 4 mg L<sup>-1</sup> interferent</p> <p>Other metals (Cu<sup>2+</sup>, Zn<sup>2+</sup>, Cd<sup>2+</sup>) have no significant effect on Hg adsorption up to 50 µg L<sup>-1</sup> interferent</p> <p>The sorbent can be reused up to 8 times without noticeable degradation in performance</p> <p>The sorbent is stable up to 6 months</p> <p>The sorbent is sensitive to pH, with adsorption of Hg decreasing from 95 % at pH &gt;6 to &lt;40 % at pH &lt;5 (active sites become protonated at lower pH values)</p> <p>Speciation and MeHg sorption were not investigated</p> | 66 |
| Task-specific monolith with vinylboronic anhydride pyridine complex as a microcolumn (for preconcentration) | Hg <sup>2+</sup> , MeHg, EtHg, PhHg | DI water, seawater, river water, lake water ( <b>filtered</b> and acidified to pH4 with HCl)                                                                                         | Methanol                                                                         | 102, 22, 28, 162 ng L <sup>-1</sup> by HPLC-diode array detector | >80 % | Storage capacity: Not investigated, 100 ng Hg per prepared column fully sorbed<br>Pore size: 230 nm                              | <ul style="list-style-type: none"> <li>+</li> <li>+</li> <li>–</li> <li>–</li> </ul>                       | <p>&gt;94 % of Hg<sup>2+</sup>, MeHg, ethylmercury and phenylmercury can be recovered under optimised conditions</p> <p>Recovery of Hg from river, sea, lake and tap water is &gt;80 % Hg</p> <p>A complexing agent is required to promote Hg extraction, which may be a source of contamination and is not readily useable in an uncontrolled environment</p> <p>A pH of 4 is necessary, as lower pH values promote H<sup>+</sup>-complexing agent formation and higher pH values may hydrolyse Hg species</p>                                                                                                                                                                                          | 67 |
| <b>Gold-based SPE</b>                                                                                       |                                     |                                                                                                                                                                                      |                                                                                  |                                                                  |       |                                                                                                                                  |                                                                                                            |                                                                                                                                                                                                                                                                                                                                                                                                                                                                                                                                                                                                                                                                                                          |    |
| Gold nanoparticles as a microcolumn (AuNP) (for preconcentration)                                           | Total Hg                            | DI water, river water ( <b>filtered</b> and acidified with 0.5% v/v HCl)                                                                                                             | Thermal desorption                                                               | 180 pg L <sup>-1</sup> by AFS                                    | >90 % | Storage capacity: Not investigated, 0.007 ng Hg fully recovered from 1 g sorbent<br>Particle size: 100-350 µm<br>Pore size: 60 Å | <ul style="list-style-type: none"> <li>+</li> <li>+</li> <li>+</li> <li>+</li> <li>+</li> <li>–</li> </ul> | <p>Highly selective for Hg due to Au-Hg amalgamation</p> <p>A &gt;99 % Hg recovery can be achieved from river waters</p> <p>No additional reagents are required for extraction of Hg</p> <p>Extracted Hg is stable for at least 2 days with no significant losses</p> <p>Speciation analysis is possible, as Hg<sup>2+</sup> thermally desorbs at approximately 550 °C and MeHg thermally desorbs at approximately 20 °C (columns should be stored at 4 °C in the dark to mitigate loss of MeHg)</p> <p>The column can be reused 180 times without loss of precision or sensitivity</p> <p>Synthesis of column should be done in Hg vapour-free conditions and reagents require purging before use</p>   | 38 |

|                                                                       |                         |                                                                                                |                    |                                |       |                                                                                                                                              |                            |                                                                                                                                                                                                                                                                                                                                                                                                                                                                                                                                                                                                                                       |    |
|-----------------------------------------------------------------------|-------------------------|------------------------------------------------------------------------------------------------|--------------------|--------------------------------|-------|----------------------------------------------------------------------------------------------------------------------------------------------|----------------------------|---------------------------------------------------------------------------------------------------------------------------------------------------------------------------------------------------------------------------------------------------------------------------------------------------------------------------------------------------------------------------------------------------------------------------------------------------------------------------------------------------------------------------------------------------------------------------------------------------------------------------------------|----|
| Gold nano-sheets as a column (for preconcentration)                   | Hg <sup>2+</sup> , MeHg | DI water, seawater, river water, lake water ( <b>filtered</b> and acidified with 0.5% v/v HCl) | Thermal desorption | 0.08 ng L <sup>-1</sup> by AFS | >96 % | Storage capacity: Not investigated, work focused on trace Hg, 0.002 ng Hg adsorbed per column<br>"Mesh size": 1024 meshes cm <sup>-2</sup>   | +<br>+<br>–<br>–           | The columns are highly selective for Hg with a high tolerance for interfering matrix components<br>>95 % recovery Hg can be achieved from river, sea and lake waters at trace concentrations (0-3 ng L <sup>-1</sup> Hg <sup>2+</sup> )<br>The columns were developed for online preconcentration, so may not be suitable for offline extraction and storage<br>Reusability of the column was not fully explored                                                                                                                                                                                                                      | 71 |
| Immobilised gold nanoparticle dipstick (for preservation and storage) | Total Hg                | DI water, river water, seawater ( <b>unfiltered</b> water, acidified with 0.5% v/v HCl)        | Thermal desorption | 0.06 ng L <sup>-1</sup> by AFS | >94 % | Storage capacity: Not investigated, work focused on trace Hg, 0.0015 ng Hg per dipstick<br>Particle size: 38 nm (14 µg Au cm <sup>-2</sup> ) | +<br>+<br>+<br>+<br>–<br>– | The dipstick is highly selective for Hg with little interferences<br>Hg is thermally desorbed from the stick, so limits the opportunity for contamination<br>Low variation was reported between individually prepared dipsticks<br>The dipsticks can be reused 145 times without significant degradation to Hg recovery<br>Specialised sputtering technology is required to synthesise the dipsticks, so synthesis may not be readily scaled up<br>The dipsticks must be annealed at 600 °C before each use, which may be challenging in the field and so must be stored in Hg-free conditions during transport to and from the field | 51 |
